# Supplementary material
Source: PubMed Central journal article supplement (PMC3021076)
Supplement: 1012356108_pnas.201012356SI.pdf [file 1012356108_pnas.201012356SI.pdf]

# Supporting Information

De Maria et al. 10.1073/pnas.1012356108

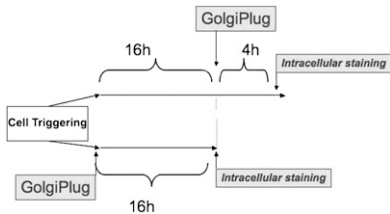

Fig. S1. Diagram of the experimental setting used to study IFN- $\gamma$  production by NK cells over different time frames.

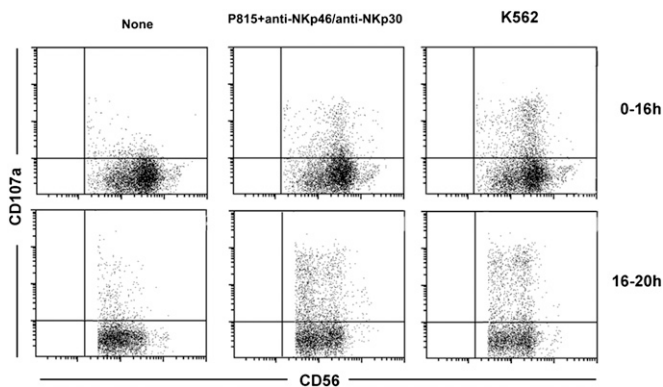

Fig. S2. CD107a expression by CD56<sup>dim</sup> NK cells upon NCR-mediated triggering. Flow cytometry of PBMCs were triggered as indicated in Fig. 1 and with K562 cells at a 10:1 E/T ratio. Analysis was performed on CD3<sup>-</sup>19<sup>-</sup>14<sup>-</sup> gated cells. CD107a expression by CD56<sup>+</sup> NK cells is shown over early (0–16 h) or late (16–20 h) times after triggering. Data are representative of five experiments.

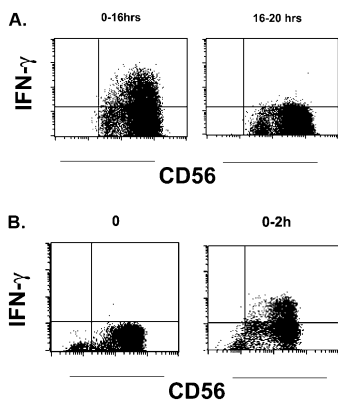

Fig. S3. IFN- $\gamma$  production by in vitro activated purified NK cells upon NCR-mediated triggering. (A) Purified IL-2-cultured NK cells were assayed for IFN- $\gamma$  production in a redirected killing assay using Fc $\gamma$ R<sup>+</sup> P815 cells and anti-NKp30/anti-NKp46 mAbs ( $\gamma$  isotype). GolgiPlug was added immediately at the time of stimulation until processed (0–16 h) or after 16 h with analysis of cells after 4 h (16–20 h). Data are representative of 10 experiments. (B) Analysis of IFN- $\gamma$  production at early times after NCR-mediated stimulation. GolgiPlug was added concomitantly with the triggering stimulus to accumulate IFN- $\gamma$  production. Data are representative of five experiments.
